# Supplementary material for: Intestinal Permeability Associated with the Loss of Skeletal Muscle Strength in Middle-Aged and Older Adults in Rural Area of Beijing, China
Source: MDPI journal article supplement (doi:10.3390/healthcare10061100), 2022-06-13
Supplement: s1 [file s1]

**Supplementary Table S1.** Subgroup analysis of general characteristics of males by age

| Characteristic            | Middle-aged males<br>N=33 | Older males<br>N=14 | <i>P</i> value |
|---------------------------|---------------------------|---------------------|----------------|
| Age (y)                   | 56.5±5.0                  | 68.9±4.1            | <0.001         |
| Body mass (kg)            | 74.1±8.7                  | 64.9±13.1           | 0.007          |
| BMI (kg/m <sup>2</sup> )  | 25.8±2.6                  | 23.6±3.8            | 0.032          |
| PBF (%)                   | 26.3±5.5                  | 25.0±6.2            | 0.495          |
| ASMI (kg/m <sup>2</sup> ) | 7.6±1.2                   | 7.0±0.9             | 0.023          |
| HGS (kg)                  | 40.8±8.9                  | 32.2±4.4            | <0.001         |
| HGSW                      | 0.6±0.1                   | 0.5±0.1             | 0.185          |
| HGSB                      | 1.6±0.4                   | 1.4±0.2             | 0.015          |
| Daily exercise level      |                           |                     |                |
| Light (n, %)              | 1 (3.0)                   | 1 (7.1)             | 0.473          |
| Moderate (n, %)           | 17 (51.6)                 | 5 (35.8)            |                |
| Vigorous (n, %)           | 14 (42.4)                 | 7 (50.0)            |                |
| No response (n, %)        | 1 (3.0)                   | 1 (7.1)             |                |
| Chronic disease           |                           |                     |                |
| Hypertension (n, %)       | 16 (48.5)                 | 9 (64.3)            | 0.321          |
| T2D (n, %)                | 5 (15.2)                  | 4 (28.6)            | 0.419          |

Quantitative data are shown as mean±SD, categorical data are shown as n (%). Abbreviations: BMI-Body mass index; PBF-Percent of body fat; ASMI-Appendicular skeletal muscle mass index; HGS-Handgrip strength; HGSW-Handgrip strength adjusted by body mass; HGSB-Handgrip strength adjusted by BMI; T2D-Type 2 diabetes.

**Supplementary Table S2.** Subgroup analysis of general characteristics of females by age

| Characteristic            | Middle-aged females<br>N=41 | Older females<br>N=4 | <i>P</i> value |
|---------------------------|-----------------------------|----------------------|----------------|
| Age (y)                   | 55.3±3.8                    | 67.5±2.6             | <0.001         |
| Body mass (kg)            | 65.3±9.1                    | 62.4±10.1            | 0.554          |
| BMI (kg/m <sup>2</sup> )  | 25.9±3.3                    | 23.6±4.0             | 0.213          |
| PBF (%)                   | 36.7±8.4                    | 32.6±3.7             | 0.169          |
| ASMI (kg/m <sup>2</sup> ) | 6.7±0.6                     | 6.3±1.0              | 0.182          |
| HGS (kg)                  | 27.4±4.4                    | 29.6±5.2             | 0.366          |
| HGSW                      | 0.4±0.1                     | 0.5±0.1              | 0.239          |
| HGSB                      | 1.1±0.2                     | 1.3±0.3              | 0.086          |
| Daily exercise level      |                             |                      |                |
| Low (n, %)                | 0 (0.0)                     | 0 (0.0)              | 0.569          |
| Middle (n, %)             | 9 (22.0)                    | 0 (0.0)              |                |
| High (n, %)               | 32 (78.0)                   | 4 (100.0)            |                |
| No response (n, %)        | 0 (0.0)                     | 0 (0.0)              |                |
| Chronic disease           |                             |                      |                |
| Hypertension (n, %)       | 16 (39.0)                   | 3 (75.0)             | 0.295          |
| T2D (n, %)                | 7 (17.1)                    | 1 (25.0)             | 0.557          |

Quantitative data are shown as mean±SD, categorical data are shown as n (%). Abbreviations: BMI-Body mass index; PBF-Percent of body fat; ASMI-Appendicular skeletal muscle mass index; HGS-Handgrip strength; HGSW-Handgrip strength adjusted by body mass; HGSB-Handgrip strength adjusted by BMI; T2D-Type 2 diabetes.

**Supplementary Table S3.** Correlations among indicators of intestinal permeability and skeletal muscle strength in middle-aged and older adults

| Indicator of intestinal permeability | Age         | HGS      |          | HGSW     |          | HGSB     |          |
|--------------------------------------|-------------|----------|----------|----------|----------|----------|----------|
|                                      |             | <i>r</i> | <i>P</i> | <i>r</i> | <i>P</i> | <i>r</i> | <i>P</i> |
| DAO                                  | Middle-aged | -0.345   | 0.003    | -0.310   | 0.007    | -0.336   | 0.003    |
|                                      | Older       | -0.313   | 0.206    | -0.198   | 0.431    | -0.228   | 0.363    |
| LPS                                  | Middle-aged | 0.102    | 0.389    | 0.092    | 0.436    | 0.075    | 0.526    |
|                                      | Older       | -0.303   | 0.222    | -0.028   | 0.913    | -0.256   | 0.306    |
| D-lactate                            | Middle-aged | -0.045   | 0.705    | -0.084   | 0.476    | -0.075   | 0.527    |
|                                      | Older       | -0.215   | 0.391    | -0.031   | 0.904    | -0.138   | 0.586    |

Abbreviations: DAO-Diamine oxidase; LPS-Lipopolysaccharide; HGS-Handgrip strength; HGSW-Handgrip strength adjusted by body mass; HGSB-Handgrip strength adjusted by BMI.

**Supplementary Table S4.** Associations among serum DAO and skeletal muscle strength in middle-aged adults

| Model   | HGS           |        |        |                | HGSW          |        |        | HGSB           |               |        |        |                |
|---------|---------------|--------|--------|----------------|---------------|--------|--------|----------------|---------------|--------|--------|----------------|
|         | $\beta$ value | 95% CI |        | <i>P</i> value | $\beta$ value | 95% CI |        | <i>P</i> value | $\beta$ value | 95% CI |        | <i>P</i> value |
| Model 1 | -2.122        | -3.480 | -0.764 | 0.003          | -0.023        | -0.040 | -0.006 | 0.007          | -0.086        | -0.142 | -0.029 | 0.003          |
| Model 2 | -1.665        | -2.880 | -0.449 | 0.008          | -0.018        | -0.032 | -0.003 | 0.020          | -0.063        | -0.111 | -0.015 | 0.011          |
| Model 3 | -0.535        | -1.653 | 0.583  | 0.342          | -0.006        | -0.021 | 0.008  | 0.405          | -0.020        | -0.065 | 0.025  | 0.373          |

Model 1: Crude model. Model 2: Adjusted by age, BMI, ASMI, PBF. Model 3: Adjusted by age, BMI, ASMI, PBF, daily exercise level, hypertension, T2Ds, gender. Abbreviations: HGS-Handgrip strength; HGSW-Handgrip strength adjusted by body mass; HGSB-Handgrip strength adjusted by BMI.

**Supplementary Table S5.** Associations among serum DAO and skeletal muscle strength in older adults

| Model   | HGS           |        |       |         | HGSW          |        |       | HGSB    |               |        |       |         |
|---------|---------------|--------|-------|---------|---------------|--------|-------|---------|---------------|--------|-------|---------|
|         | $\beta$ value | 95% CI |       | P value | $\beta$ value | 95% CI |       | P value | $\beta$ value | 95% CI |       | P value |
| Model 1 | -0.658        | -1.717 | 0.400 | 0.206   | -0.008        | -0.029 | 0.013 | 0.431   | -0.024        | -0.077 | 0.030 | 0.363   |
| Model 2 | -0.881        | -1.929 | 0.168 | 0.092   | -0.012        | -0.029 | 0.005 | 0.152   | -0.037        | -0.079 | 0.005 | 0.078   |
| Model 3 | -0.941        | -2.758 | 0.875 | 0.260   | -0.006        | -0.031 | 0.019 | 0.578   | -0.039        | -0.112 | 0.033 | 0.241   |

Model 1: Crude model. Model 2: Adjusted by age, BMI, ASMI, PBF. Model 3: Adjusted by age, BMI, ASMI, PBF, daily exercise level, hypertension, T2Ds, gender. Abbreviations: HGS-Handgrip strength; HGSW-Handgrip strength adjusted by body mass; HGSB-Handgrip strength adjusted by BMI.

**Supplementary Table S6.** Associations among serum LPS and skeletal muscle strength in middle-aged and older males

| Model   | HGS           |         |        |         | HGSW          |        |       |         | HGSB          |        |       |         |
|---------|---------------|---------|--------|---------|---------------|--------|-------|---------|---------------|--------|-------|---------|
|         | $\beta$ value | 95% CI  |        | P value | $\beta$ value | 95% CI |       | P value | $\beta$ value | 95% CI |       | P value |
| Model 1 | 11.141        | -69.855 | 92.136 | 0.783   | 0.278         | -0.709 | 1.265 | 0.573   | 0.412         | -2.818 | 3.641 | 0.799   |
| Model 2 | 10.167        | -52.369 | 72.704 | 0.744   | 0.249         | -0.576 | 1.075 | 0.545   | 0.327         | -2.197 | 2.851 | 0.795   |
| Model 3 | 7.088         | -60.601 | 74.777 | 0.833   | 0.188         | -0.701 | 1.077 | 0.671   | 0.188         | -2.537 | 2.913 | 0.890   |

Model 1: Crude model. Model 2: Adjusted by age, BMI, ASMI, PBF. Model 3: Adjusted by age, BMI, ASMI, PBF, daily exercise level, hypertension and T2Ds. Abbreviations: HGS-Handgrip strength; HGSW-Handgrip strength adjusted by body mass; HGSB-Handgrip strength adjusted by BMI.

**Supplementary Table S7.** Associations among serum LPS and skeletal muscle strength in middle-aged and older females

| Model   | HGS           |         |        |         | HGSW          |        |       |         | HGSB          |        |       |         |
|---------|---------------|---------|--------|---------|---------------|--------|-------|---------|---------------|--------|-------|---------|
|         | $\beta$ value | 95% CI  |        | P value | $\beta$ value | 95% CI |       | P value | $\beta$ value | 95% CI |       | P value |
| Model 1 | 27.879        | -14.257 | 70.014 | 0.189   | 0.300         | -0.498 | 1.098 | 0.452   | 0.717         | -1.426 | 2.860 | 0.504   |
| Model 2 | 28.447        | -15.995 | 72.889 | 0.203   | 0.451         | -0.240 | 1.142 | 0.195   | 0.926         | -0.859 | 2.711 | 0.301   |
| Model 3 | 38.683        | -5.019  | 82.385 | 0.081   | 0.572         | -0.120 | 1.263 | 0.102   | 1.292         | -0.494 | 3.078 | 0.151   |

Model 1: Crude model. Model 2: Adjusted by age, BMI, ASMI, PBF. Model 3: Adjusted by age, BMI, ASMI, PBF, daily exercise level, hypertension and T2Ds. Abbreviations: HGS-Handgrip strength; HGSW-Handgrip strength adjusted by body mass; HGSB-Handgrip strength adjusted by BMI.

**Supplementary Table S8.** Associations among serum *D*-lactate and skeletal muscle strength in middle-aged and older males

| Model   | HGS           |               |        |                | HGSW          |               |       |                | HGSB          |               |       |                |
|---------|---------------|---------------|--------|----------------|---------------|---------------|-------|----------------|---------------|---------------|-------|----------------|
|         | $\beta$ value | 95% <i>CI</i> |        | <i>P</i> value | $\beta$ value | 95% <i>CI</i> |       | <i>P</i> value | $\beta$ value | 95% <i>CI</i> |       | <i>P</i> value |
| Model 1 | -2.966        | -12.918       | 6.986  | 0.551          | -0.075        | -0.195        | 0.044 | 0.212          | -0.278        | -0.668        | 0.111 | 0.157          |
| Model 2 | 1.788         | -6.425        | 10.002 | 0.663          | 0.035         | -0.074        | 0.143 | 0.523          | 0.060         | -0.272        | 0.391 | 0.718          |
| Model 3 | 3.625         | -5.459        | 12.709 | 0.424          | 0.062         | -0.057        | 0.181 | 0.299          | 0.137         | -0.229        | 0.503 | 0.454          |

Model 1: Crude model. Model 2: Adjusted by age, BMI, ASMI, PBF. Model 3: Adjusted by age, BMI, ASMI, PBF, daily exercise level, hypertension and T2Ds. Abbreviations: HGS-Handgrip strength; HGSW-Handgrip strength adjusted by body mass; HGSB-Handgrip strength adjusted by BMI.

**Supplementary Table S9.** Associations among serum *D*-lactate and skeletal muscle strength in middle-aged and older females

| Model   | HGS           |               |       |                | HGSW          |               |       | HGSB           |               |               |       |                |
|---------|---------------|---------------|-------|----------------|---------------|---------------|-------|----------------|---------------|---------------|-------|----------------|
|         | $\beta$ value | 95% <i>CI</i> |       | <i>P</i> value | $\beta$ value | 95% <i>CI</i> |       | <i>P</i> value | $\beta$ value | 95% <i>CI</i> |       | <i>P</i> value |
| Model 1 | -1.476        | -6.943        | 3.990 | 0.589          | 0.020         | -0.082        | 0.122 | 0.697          | 0.078         | -0.195        | 0.352 | 0.567          |
| Model 2 | -0.467        | -6.301        | 5.366 | 0.872          | -0.013        | -0.104        | 0.078 | 0.773          | 0.027         | -0.206        | 0.259 | 0.818          |
| Model 3 | 0.196         | -5.725        | 6.117 | 0.947          | 0.002         | -0.091        | 0.095 | 0.962          | 0.056         | -0.182        | 0.294 | 0.636          |

Model 1: Crude model. Model 2: Adjusted by age, BMI, ASMI, PBF. Model 3: Adjusted by age, BMI, ASMI, PBF, daily exercise level, hypertension and T2Ds. Abbreviations: HGS-Handgrip strength; HGSW-Handgrip strength adjusted by body mass; HGSB-Handgrip strength adjusted by BMI.

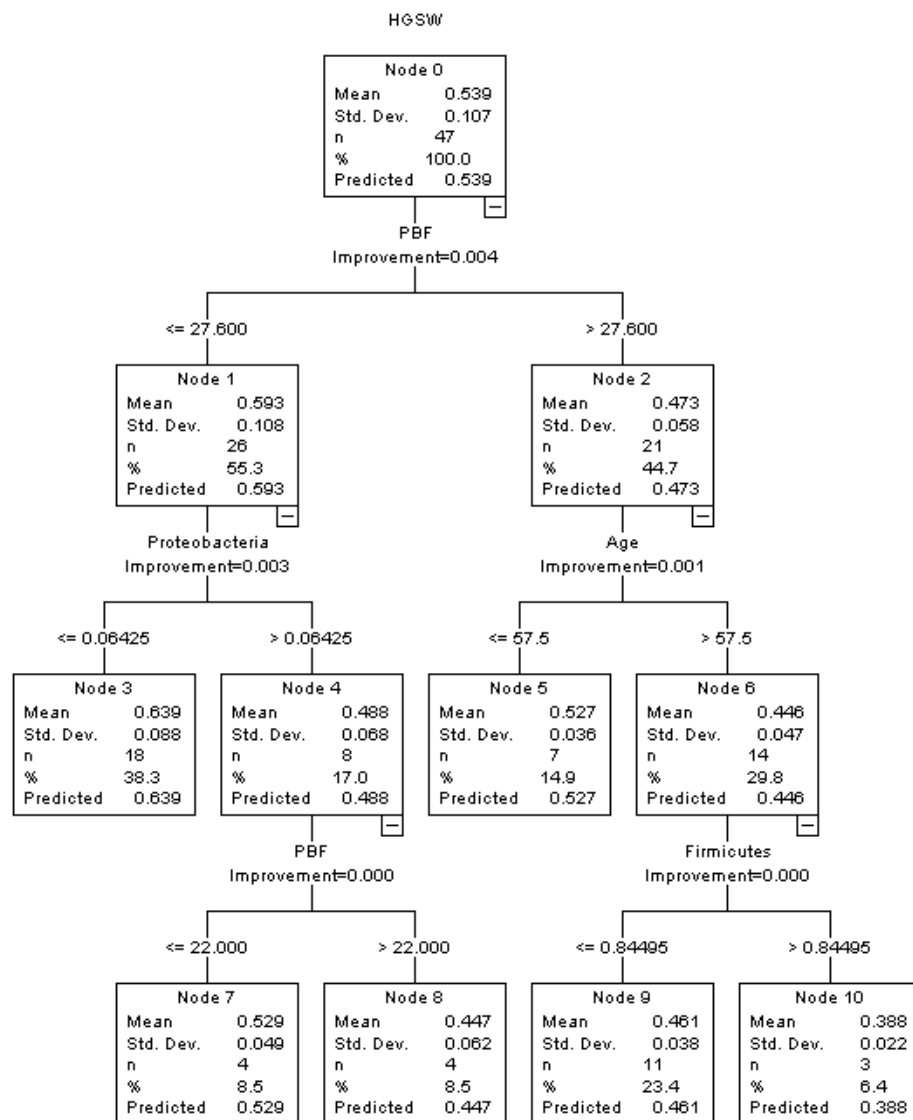

**Supplementary Figure S1.** Associations among intestinal permeability, GM and HGSW in middle-aged and older males in the decision tree model

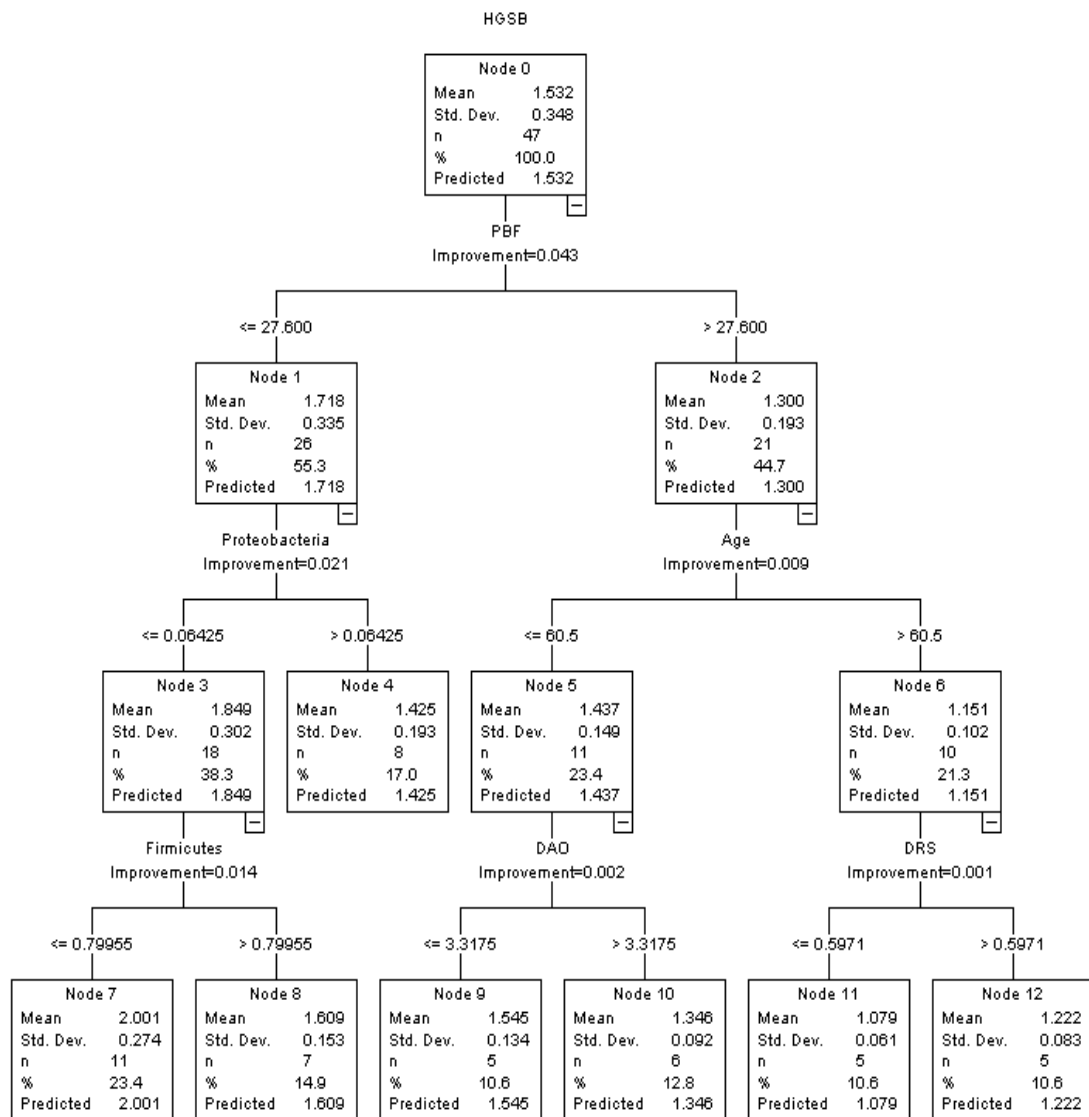

**Supplementary Figure S2.** Associations among intestinal permeability, GM and HGSB in middle-aged and older males in the decision tree model

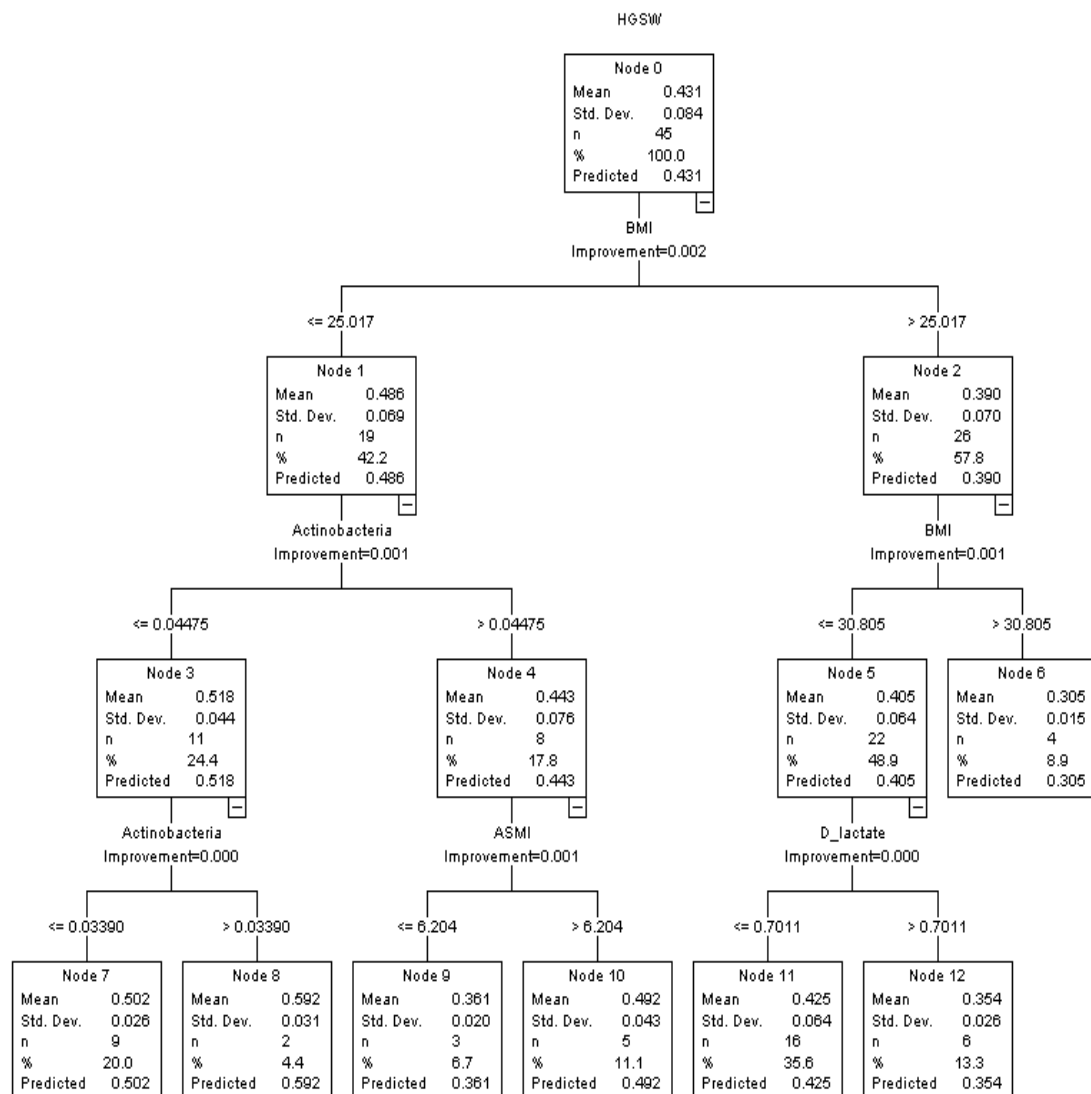

**Supplementary Figure S3.** Associations among intestinal permeability, GM and HGSW in middle-aged and older females in the decision tree model

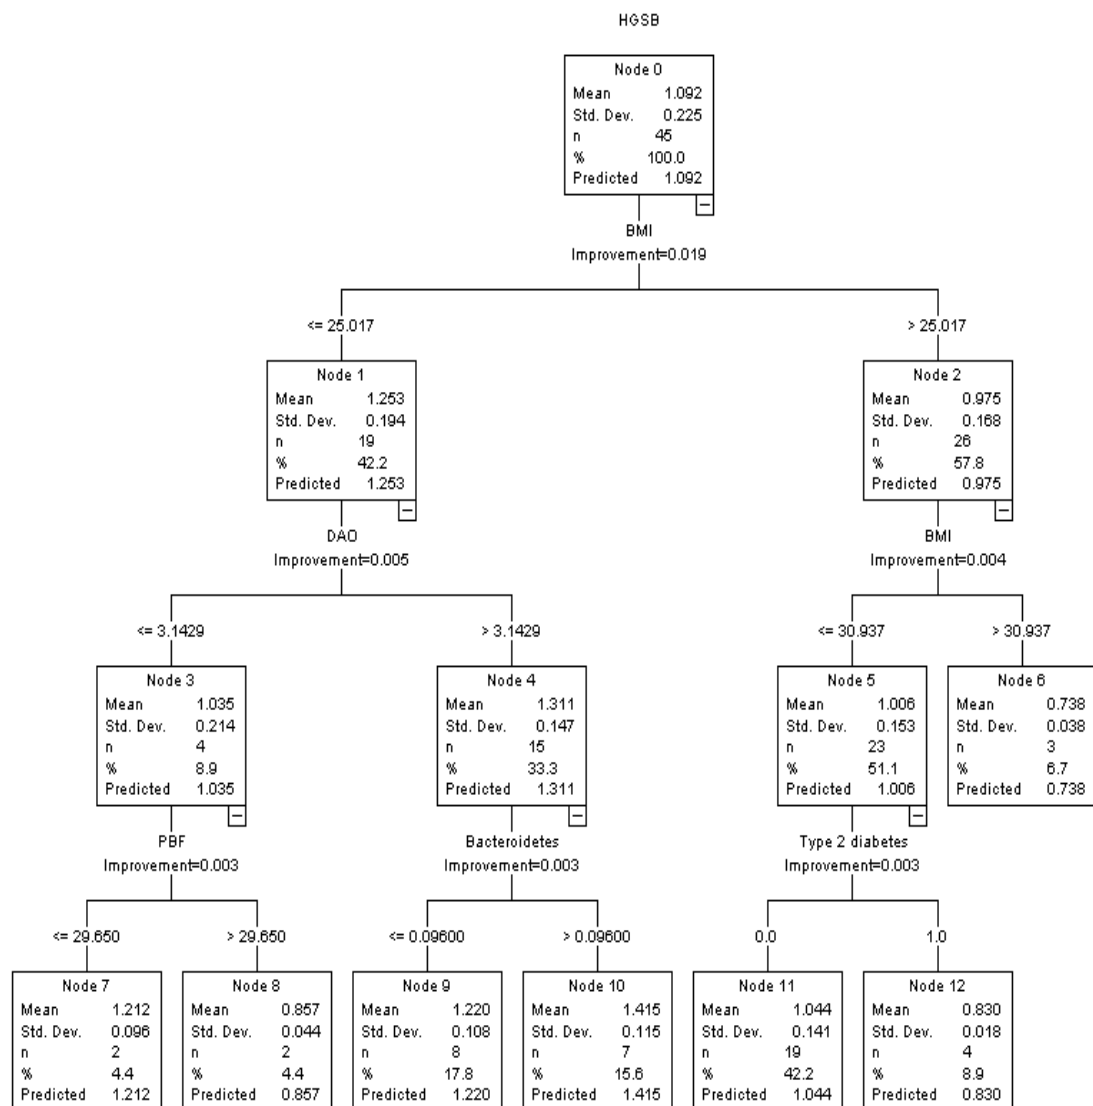

**Supplementary Figure S4.** Associations among intestinal permeability, GM and HGSB in middle-aged and older females in the decision tree model
